# Supplementary material for: Prognostic Significance of Tumor Growth Rate (TGR) in Patients with Huge Hepatocellular Carcinoma Undergoing Transcatheter Arterial Chemoembolization
Source: MDPI journal article supplement (doi:10.3390/curroncol29020038), 2022-01-18
Supplement: s1 [file s1]

**Table S1.** the subsequent combination therapy of the HHCC cohort.

| <b>Treatment</b>   | <b>Number (n = 56,%)</b> |
|--------------------|--------------------------|
| Targeted therapy   | 44 (78.6%)               |
| Immunotherapy      | 9 (16.1%)                |
| Ablation therapy   | 3 (5.4%)                 |
| Radiation therapy  | 1 (1.8%)                 |
| Surgical resection | 10 (17.9%)               |
